# Supplementary material
Source: ML conference proceedings conference paper supplement (https://proceedings.mlr.press/v33/dworkin14.html)
Supplement: Supplementary file 1 [file dworkin14-supp.pdf]

## Technical Appendix

**Threshold DNFs** An exponentially large standard DNF is required to represent a threshold DNF. Consider a threshold DNF with just a single term containing all  $n$  of the binary variables  $x_1, \dots, x_n$ , and let the threshold value be  $\frac{n}{2}$ , with each variable having equal weight. Consider any standard DNF for this  $\frac{n}{2}$  threshold function, and let  $T$  be any term in it. If  $T$  has fewer than  $\frac{n}{2}$  variables appearing unnegated, then  $T$  has a satisfying assignment with fewer than  $\frac{n}{2}$  bits on, which is a contradiction. Furthermore, if  $T$  has any variables appearing negated, then these variables can be removed, and all previously satisfying assignments for  $T$  will remain satisfying. Thus, the smallest  $T$  will contain only unnegated variables, and at least  $\frac{n}{2}$  of them. The DNF formula must contain such a term for every possible subset of  $\frac{n}{2}$  bits, of which there are exponentially many.

**Section 5 Assumptions** In Section 5 we assume that the tree is binary and that the distribution  $P$  is given over the leaves only. To remove the first assumption, rather than summing over  $\{x, y \mid x + y = i\}$ , we use another dynamic program that calculates the probability that exactly  $i$  amount of weight is distributed among the children of  $u$ . The approach is similar to calculating the probability that exactly  $k$  out of  $n$  biased coins come up heads. To remove the second assumption, we check at each node  $u$  (not just the leaves) whether  $u$  corresponds to a literal in  $T$ , and if so, we make a case analysis similar to the one currently restricted to our base case.

**Lemma 1.** The GenAssign subroutine for DNF formulas generates an assignment  $v \in V$  with probability  $\hat{P}(v)/\hat{P}(T)$ .

*Proof.* Let  $x_1, \dots, x_m$  denote variables in the order as they appear in the loop from lines 5 to 12, where  $m = n - |T|$ . Let  $v$  be the assignment generated by GenAssign( $P, T, \epsilon$ ). Let  $l_i = (x_i, v_{x_i})$ . The probability that  $v$  was generated is

$$\frac{\hat{P}(T \wedge l_1)}{\hat{P}(T)} \times \frac{\hat{P}(T \wedge l_1 \wedge l_2)}{\hat{P}(T \wedge l_1)} \times \dots \times \frac{\hat{P}(v)}{\hat{P}(T \wedge l_1, \dots, l_m)}.$$

After cancelling terms, we have  $\hat{P}(v)/\hat{P}(T)$ .  $\square$

**Lemma 2.** The GenAssign subroutine for threshold DNFs generates an assignment  $v \in V$  with probability  $P(v)/P(T)$ .

*Proof.* The probability that an assignment  $v$  is gener-

ated is:

$$\begin{aligned} & \frac{\Pr[Q_r^T(i)]}{\sum_{i=q}^{W(T)} \Pr[Q_r^T(i)]} \times \\ & \frac{\Pr[r = v_r] \Pr[Q_r^T(i) \mid r = v_r]}{\Pr[Q_r^T(i)]} \times \\ & \frac{\Pr[Q_{r_L}^T(x) \mid r = v_r] \Pr[Q_{r_R}^T(y) \mid r = v_r]}{\Pr[Q_r^T(i) \mid r = v_r]} \times \\ & \frac{\Pr[r_L = v_{r_L} \mid r = v_r] \Pr[Q_{r_L}^T(x) \mid r_L = v_{r_L}]}{\Pr[Q_{r_L}^T(x) \mid r = v_r]} \times \\ & \frac{\Pr[r_R = v_{r_R} \mid r = v_r] \Pr[Q_{r_R}^T(y) \mid r_R = v_{r_R}]}{\Pr[Q_{r_R}^T(y) \mid r = v_r]} \times \dots \end{aligned}$$

After cancelling terms, we have

$$\begin{aligned} & \frac{\Pr[r = v_r] \Pr[r_L = v_{r_L} \mid r = v_r] \Pr[r_R = v_{r_R} \mid r = v_r] \dots}{\sum_{i=q}^{W(T)} \Pr[Q_r^T(i)]} \\ & = \frac{\Pr[r = v_r \wedge r_L = v_{r_L} \wedge r_R = v_{r_R} \dots]}{P(T)} \\ & = \frac{P(v)}{P(T)}. \end{aligned}$$

$\square$

**Lemma 3.** The GenAssign subroutine for threshold DNFs generates an assignment  $v \in V$  such that  $v$  satisfies  $T$ .

*Proof.* It suffices to prove that the process generates an assignment  $v$  in which the weighted sum of satisfied literals is equal to  $i$ , where  $i \geq q$  is the value we chose in the first step. We will use induction to prove the following more general claim. For any internal node  $u$ , if we have chosen the value for the weighted sum of satisfied literals in  $u$ 's subtree to be  $i$ , then the generated assignment will meet this requirement.

Suppose we are at a leaf node  $u$  where  $l = (u, 1) \in T$  and we have chosen  $u_P = b$ . We then choose  $i$  with probability proportional to  $\Pr[Q_u^T(i)]$ . The only values for  $i$  which correspond to a nonzero probability are  $w(l)$  and 0. In order for  $u$ 's literal to be satisfied,  $u$ 's value must be 1. So if we have chosen  $i$  to be  $w(l)$ , then we should choose  $u$ 's value to be 1 with probability 1. According to the subroutine, we choose the value for  $u$  to be 1 with probability equal to

$$\begin{aligned} & \frac{\Pr[u = 1 \mid u_P = b] \Pr[Q_u^T(w(l)) \mid u = 1]}{\Pr[Q_u^T(w(l)) \mid u_P = b]} \\ & = \frac{\Pr[u = 1 \mid u_P = b](1)}{\Pr[u = 1 \mid u_P = b]} \\ & = 1. \end{aligned}$$

---

On the other hand, if we have chosen  $i$  to be 0, then we should choose  $u$ 's value to be 0 with probability 1. According to the process, we choose the value for  $u$  to be 0 with probability equal to

$$\begin{aligned} & \frac{\Pr[u = 0 \mid u_P = b] \Pr[Q_u^T(0) \mid u = 0]}{\Pr[Q_u^T(0) \mid u_P = b]} \\ &= \frac{\Pr[u = 0 \mid u_P = b](1)}{\Pr[u = 0 \mid u_P = b]} = 1. \end{aligned}$$

The case where  $l = (u, 0) \in T$  follows similarly. For the inductive step, suppose we are at a node  $u$  and have chosen the value  $i$ . According to the subroutine, we have also chosen values  $x, y$  for the subtrees of  $u_L$  and  $u_R$ , such that  $x + y = i$ . By the induction hypothesis, we can assume that the conditions were met for  $u_L$  and  $u_R$ . Thus, the weighted sum of satisfied literals in the subtree of  $u$  will be equal to  $x + y = i$ .  $\square$
